# Supplementary material for: Hericium coralloides Ameliorates Alzheimer’s Disease Pathologies and Cognitive Disorders by Activating Nrf2 Signaling and Regulating Gut Microbiota
Source: MDPI journal article supplement (doi:10.3390/nu15173799), 2023-08-30
Supplement: s1 [file s1]

## Supplementary Data

Table S1. Details of antibodies used in Western blotting.

| Antibody                  | Molecular weight | Catalog number | Dilution | Company     | Area                |
|---------------------------|------------------|----------------|----------|-------------|---------------------|
| t-tau                     | 79 kDa           | A0002          | 1:2000   | ABclonal    | Wuhan, China        |
| p-tau                     | 79 kDa           | ab32057        | 1:2000   | Abcam       | Cambridge, MA, USA  |
| A $\beta$ <sub>1-40</sub> | 4.3 kDa          | bs-0877R       | 1:2000   | Bioss       | Beijing, China      |
| A $\beta$ <sub>1-42</sub> | 4.4 kDa          | bs-0107R       | 1:2000   | Bioss       | Beijing, China      |
| GAPDH                     | 35 kDa           | E-AB-40337     | 1:2000   | Elabscience | Wuhan, China        |
| Nrf2                      | 100 kDa          | A1244          | 1:1000   | ABclonal    | Wuhan, China        |
| GCLC                      | 73 kDa           | bs-23393R      | 1:1500   | Bioss       | Beijing, China      |
| HO-1                      | 33 kDa           | AF5393         | 1:1000   | Affinity    | Cincinnati, OH, USA |
| NQO1                      | 31 kDa           | A19586         | 1:2000   | ABclonal    | Wuhan, China        |
| SOD1                      | 16 kDa           | A12537         | 1:1000   | ABclonal    | Wuhan, China        |
| SOD2                      | 22 kDa           | A1340          | 1:1000   | ABclonal    | Wuhan, China        |
| 4-HNE                     | 67 kDa           | bs-6313R       | 1:1000   | Bioss       | Beijing, China      |
| Bcl-2                     | 26 kDa           | A0208          | 1:1000   | ABclonal    | Wuhan, China        |
| Bax                       | 21 kDa           | A19684         | 1:1000   | ABclonal    | Wuhan, China        |
| goat anti-mouse           |                  | E-AB-1001      | 1:4000   | Elabscience | Wuhan, China        |
| goat anti-rabbit          |                  | E-AB-1003      | 1:4000   | Elabscience | Wuhan, China        |

Table S2. Relative abundance of top 20 genera among WT, APP/PS1 and APP/PS1+HC.

| <b>Taxa</b>                   | <b>WT</b> | <b>APP/PS1</b> | <b>APP/PS1+HC</b> |
|-------------------------------|-----------|----------------|-------------------|
| <i>Muribaculum</i>            | 0.168931  | 0.147624       | 0.119309745       |
| <i>Lactobacillus</i>          | 0.024037  | 0.090404       | 0.106769995       |
| <i>Lachnospirillum</i>        | 0.069882  | 0.04285        | 0.035904689       |
| <i>Eisenbergiella</i>         | 0.012297  | 0.025235       | 0.031373288       |
| <i>Akkermansia</i>            | 0.006255  | 0.051867       | 0.000128735       |
| <i>Desulfovibrio</i>          | 0.023127  | 0.011201       | 0.003374753       |
| <i>Bacteroides</i>            | 0.004681  | 0.012425       | 0.019031598       |
| <i>Alistipes</i>              | 0.008606  | 0.01562        | 0.008180541       |
| <i>Erysipelatoclostridium</i> | 0.00457   | 0.009511       | 0.016109862       |
| <i>Anaerotruncus</i>          | 0.009517  | 0.005499       | 0.010060246       |
| <i>Helicobacter</i>           | 0.00188   | 0.012341       | 0.009718913       |
| <i>Staphylococcus</i>         | 0.002836  | 0.009946       | 0.002749092       |
| <i>Kineothrix</i>             | 0.003342  | 0.002538       | 0.00727808        |
| <i>Butyrivibrio</i>           | 0.004694  | 0.002369       | 0.001389474       |
| <i>Oscillibacter</i>          | 0.00455   | 0.001589       | 0.002256994       |

---

|                               |          |          |             |
|-------------------------------|----------|----------|-------------|
| <i>Ruminococcus</i>           | 0.002902 | 0.001924 | 0.00329547  |
| <i>Prevotella</i>             | 0.005757 | 0.000174 | 0.00004539  |
| <i>Faecalibaculum</i>         | 0.001701 | 0.004107 | 0.00004997  |
| <i>Neglecta</i>               | 0.003233 | 0.001031 | 0.001406    |
| <i>Candidatus Arthromitus</i> | 0.003019 | 0.000441 | 0.001529127 |

---

Data are presented as the mean.

Table S3. The differential metabolites of serum among WT, APP/PS1 and APP/PS1+HC.

| Metabolites               | WT          | APP/PS1     | APP/PS1+HC  | ANOVA <i>P</i> value |
|---------------------------|-------------|-------------|-------------|----------------------|
| Phosphocholine            | 9334151.018 | 26085118.25 | 13626510.64 | 0.001338             |
| Oligomycin b              | 2080200.549 | 6223581.442 | 2123645.369 | 0.01381              |
| Bisphenol af              | 145204716.6 | 241463850   | 164955740.4 | 0.020436             |
| 3,4-dihydroxyacetophenone | 4243171.542 | 3899588.444 | 4898134.431 | 0.015564             |
| Vitexin                   | 575009.3181 | 288833.2647 | 404925.8763 | 0.026925             |
| Propranolol               | 1857670.674 | 821794.0851 | 2385704.623 | 0.04404              |
| D-Glutamic acid           | 54131865.59 | 67947340.77 | 55742368.18 | 0.003671             |
| Oxidized glutathione      | 15201929.28 | 18239389.14 | 15857783.28 | 0.015878             |

Data are presented as the mean.

Differences are considered statistically significant at ANOVA *P* value <0.05

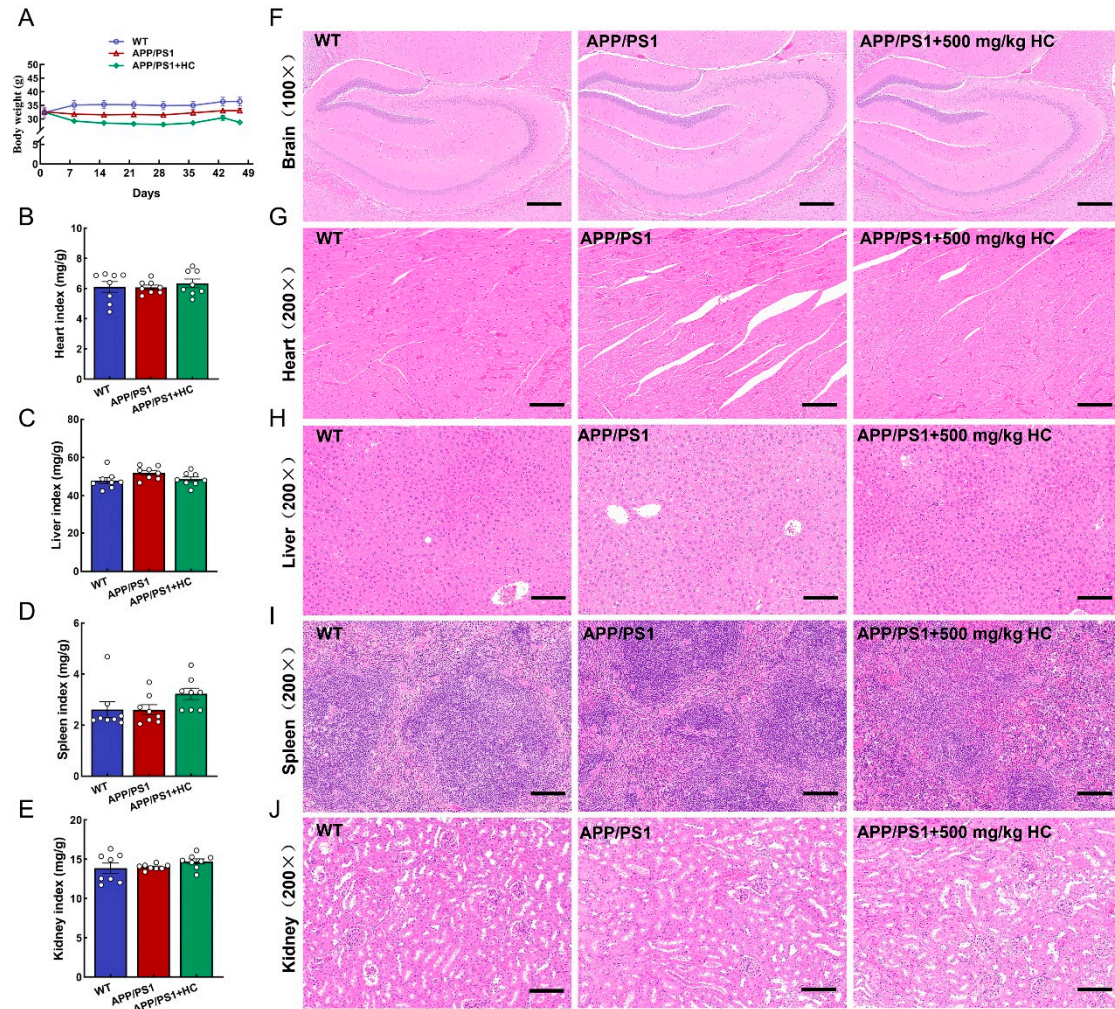

**Figure S1 Safety evaluation of APP/PS1 mice treated with HC.** (A) The body weight changes ( $n = 8$ ). (B) Heart index, (C) liver index, (D) spleen index, and (E) kidney index of APP/PS1 mice ( $n = 8$ ). Representative images of H&E staining of the (F) brain, (G) heart, (H) liver, (I) spleen, and (J) kidney (scale bar: 100  $\mu$ m) ( $n = 3$ ). Data are expressed as mean  $\pm$  S.E.M..

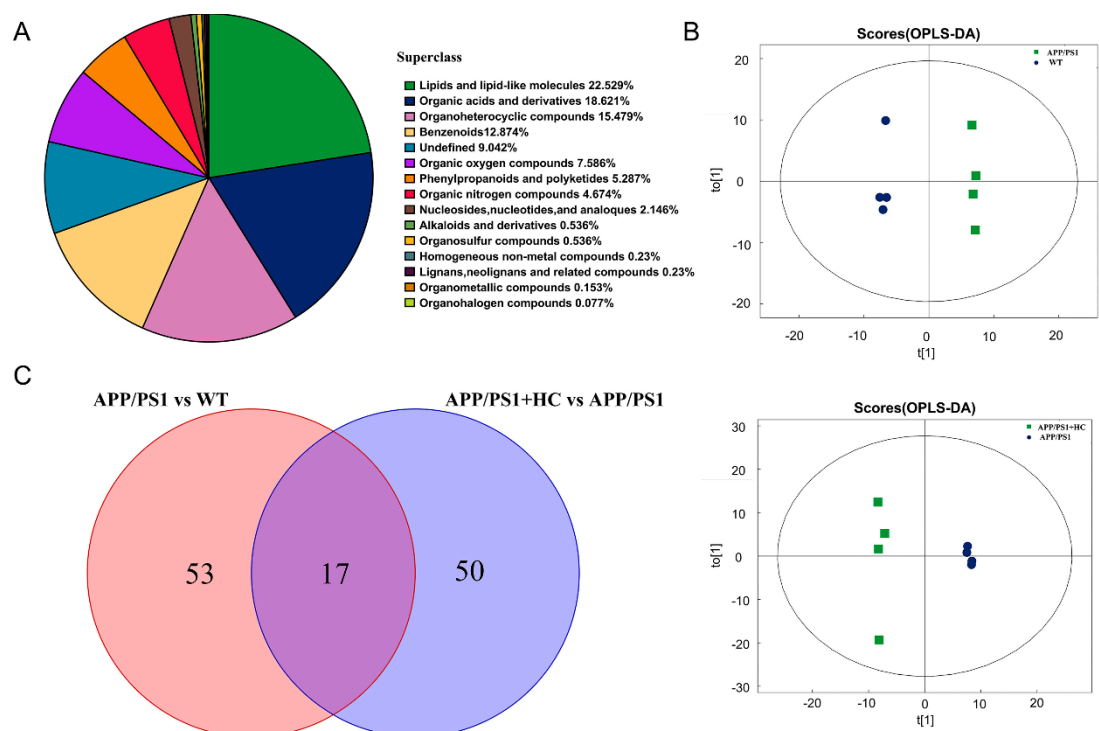

**Figure S2 Classification, quantity and multidimensional statistical analysis of metabolites.** (A) The proportion of identified metabolites in each chemical classification. (B) OPLS-DA score map of the WT mice and APP/PS1 mice (above), OPLS-DA score map of HC treated APP/PS1 mice and APP/PS1 mice (below) ( $n = 4$ ). (C) Venn diagram.
